# Supplementary material for: Evaluating the contribution of pyoverdine to the anti-Phytophthora activity of two potato-associated Pseudomonas strains
Source: Research Square preprint supplement (doi:10.21203/rs.3.rs-7139568/v1), 2025-08-07
Supplement: Supplementary file 1 [file b5c973c17f15cd150b08a308.docx]

**Supplementary figure legends**

**Fig. S1: Growth curves of R32 and R47 genotypes.**

Growth of R32 and R47 and their respective mutants was monitored during 60 h in different liquid growth media: **A:** LB, **B:** filtered V8 and **C:** KB.

**Fig. S2: Evolution of pyoverdine production over 60h.**

Pyoverdine production of both R32 and R47 and their mutants in liquid KB was monitored over 60h. Pyoverdine was measured by fluorescence at 405 nm excitation and 460 nm emission wavelengths.

**Fig. S3: Assessment of growth during dual assays on V8 medium with different iron concentrations.**

Bacterial colonies were collected after 12 days of dual assay and CFUs were counted. The control condition (0 mg.L-1 added FeCl3) was compared to the 3 different FeCl3 concentrations. Statistical analysis was performed using a t-test comparing every condition to the control condition. No significant changes could be detected.

**Fig. S4: *P. infestans* zoospore release in presence of *Pseudomonas* R32 and R47.** Percentages of empty sporangia exposed to bacteria. Bars represent the mean of 3 biological replicates with each 3 technical replicates. Statistical analysis was performed using a Kruskal-Wallis multiple comparisons test, followed by a Dunn’s test. Zoospores were exposed to: **A:** *P. infestans* strain Rec01 sporangia exposed to bacteria at OD600=0.25, **B:** *P. infestans* strain Rec01 sporangia exposed to bacteria at OD600=0.5, **C**: *P. infestans* strain 44 sporangia exposed to bacteria at OD600=0.25, **D**: *P. infestans* strain 44 sporangia exposed to bacteria at OD600=0.5.

**Fig. S5: *P. infestans* zoospore germination in presence of *Pseudomonas* R32 and R47.** Percentages of germinated zoospores exposed to bacteria. Bars represent the mean of 3 biological replicates with each 3 technical replicates. Statistical analysis was performed using a Kruskal-Wallis multiple comparisons test, followed by a Dunn’s test. Zoospores were exposed to: **A:** *P. infestans* strain Rec01 zoospores exposed to bacteria at OD600=0.25, **B:** *P. infestans* strain Rec01 zoospores exposed to bacteria at OD600=0.5, **C**: *P. infestans* strain 44 zoospores exposed to bacteria at OD600=0.25, **D**: *P. infestans* strain 44 zoospores exposed to bacteria at OD600=0.5.

**Fig. S6: *P. infestans* sporangia germination in presence of *Pseudomonas* R32 and R47.** Percentages of germinated sporangia exposed to bacteria. Bars represent the mean of 3 biological replicates with each 3 technical replicates. Statistical analysis was performed using a Kruskal-Wallis multiple comparisons test, followed by a Dunn’s test. Sporangia were exposed to: **A**: *P. infestans* strain GFP sporangia exposed to bacteria at OD600=0.1, **B**: *P. infestans* strain GFP zoospores exposed to bacteria at OD600=0.25, **C**: *P. infestans* strain Rec01 sporangia exposed to bacteria at OD600=0.1, **D**: *P. infestans* strain Rec01 sporangia exposed to bacteria at OD600=0.25, **E:** *P. infestans* strain 44 sporangia exposed to bacteria at OD600=0.1, **F:** *P. infestans* strain 44 sporangia exposed to bacteria at OD600=0.25.

**Supplementary tables**

**Table S1: List of strains and plasmids used for knocking out *pvdE* in R32 and R47.**

| **Strain/Plasmid** | **Relevant description** | **Reference** |
| --- | --- | --- |
| pEMG | KanamycinR, *ori* R6K, *lacZ* α, I-SceI sites | Martínez-García et al., 2011 |
| pSW-2 | GentamycinR, *ori* RK2, *I-sceI* I | Martínez-García et al., 2011 |
| pEMG::∆*pvdE*_R32WT | pEMG plasmid containing 1.2kb fragment 1-fragment 3 EcoRI-BamHI insert from R32WT for deleting *pvdE* | This work |
| pEMG::∆*pvdE*_R47WT | pEMG plasmid containing 1.4kb fragment 1-fragment 3 EcoRI-BamHI insert from R47WT for deleting *pvdE* | This work |
| R32 WT | Wild-type strain | Hunziker et al., 2015 |
| R47 WT | Wild-type strain | Hunziker et al., 2015 |
| R32 ∆*hcn* | ∆*hcn* in-frame deletion mutant of R32 wild-type | Anand et al., 2020 |
| R47 ∆*hcn* | ∆*hcn* in-frame deletion mutant of R47 wild-type | Anand et al., 2020 |
| R32 WT pEMG::∆*pvdE* | Wild-type strain with pEMG::del*pvdE*R32 plasmid, kmR | This work |
| R47 WT pEMG::∆*pvdE* | Wild-type strain with pEMG::del*pvdE*R47 plasmid, kmR | This work |
| R32 ∆*hcn* pEMG::∆*pvdE* | ∆*hcn* strain with pEMG::del*pvdE*R32 plasmid, kmR | This work |
| R47 ∆*hcn* pEMG::∆*pvdE* | ∆*hcn* strain with pEMG::del*pvdE*R47 plasmid, kmR | This work |
| R32 ∆*hcn* ∆*pvdE* | ∆*pvdE* in-frame deletion mutant of R32 ∆*hcn* | This work |
| R47 ∆*hcn* ∆*pvdE* | ∆*pvdE* in-frame deletion mutant of R47 ∆*hcn* | This work |

| **Primer** | **Sequence; restriction sites (underlined)** | **Usage** |
| --- | --- | --- |
| R32 pvdE 1 | CGGGATCCGCCGACGAGATCAGCCAG | Verification of insertion in R32 |
| R32 pvdE4 | CGGAATTCTGGCCTGCTGGCCGAA | Verification of insertion in R32 |
| R47 pvdE1 | CGGGATCCCATGTAGCGCTCGTGA | Fragment 1 for R47 |
| R47 pvdE2 | GGGGTACCAGTGCAGGGCGTTGTT | Fragment 1 for R47 |
| R47 pvdE3 | GGGGTACCGCAAGACCATCATCGT | Fragment 2 for R47 |
| R47 pvdE4 | CGGAATTCGAACTCCTGCAGGGCC | Fragment 2 for R47 |

**Table S2: List of primers used for knocking out *pvdE* in R32 and R47.** Underlined sequences contain restriction sites necessary for truncating the target gene.

| **R32** | **0 mg.L-1** | | **1 mg.L-1** | | **12 mg.L-1** | | **27 mg.L-1** | |
| --- | --- | --- | --- | --- | --- | --- | --- | --- |
| **WT vs. ∆*pvdE*** | <0.001 | *** | <0.001 | *** | 0.002 | ** | <0.001 | *** |
| **WT vs. ∆*hcn*** | <0.001 | *** | 0.206 | ns | 0.001 | ** | 0.051 | ns |
| **WT vs. ∆*pvdE* ∆*hcn*** | <0.001 | *** | <0.001 | *** | <0.001 | *** | <0.001 | *** |
| **∆*pvdE* vs. ∆*hcn*** | <0.001 | *** | 0.236 | ns | 0.06 | ns | <0.001 | *** |
| **∆*pvdE* vs. ∆*pvdE* ∆*hcn*** | 0.192 | ns | <0.001 | *** | 0.001 | ** | <0.001 | *** |
| **∆*hcn* vs. ∆*pvdE* ∆*hcn*** | <0.001 | *** | 0.002 | ** | <0.001 | *** | <0.001 | *** |
| **R47** | **0 mg.L-1** | | **1 mg.L-1** | | **12 mg.L-1** | | **27 mg.L-1** | |
| **WT vs. ∆*pvdE*** | <0.001 | *** | 0.021 | * | 0.563 | ns | 0.849 | ns |
| **WT vs. ∆*hcn*** | 0.998 | ns | 0.274 | ns | 0.686 | ns | 0.808 | ns |
| **WT vs. ∆*pvdE* ∆*hcn*** | <0.001 | *** | 0.073 | ns | 0.475 | ns | 0.512 | ns |
| **∆*pvdE* vs. ∆*hcn*** | 0.004 | ** | 0.033 | * | 0.985 | ns | 0.575 | ns |
| **∆*pvdE* vs. ∆*pvdE* ∆*hcn*** | 0.199 | ns | 0.699 | ns | >0.999 | ns | 0.386 | ns |
| **∆*hcn* vs. ∆*pvdE* ∆*hcn*** | 0.002 | ** | 0.049 | * | 0.973 | ns | 0.995 | ns |
|  |  |  |  |  |  |  |  |  |
| **R32** | **WT** | | **∆*pvdE*** | | **∆*hcn*** | | **∆*pvdE* ∆*hcn*** | |
| **0 mg.L-1 vs. 1 mg.L-1** | 0.016 | * | 0.026 | * | <0.001 | *** | 0.208 | ns |
| **0 mg.L-1 vs. 12 mg.L-1** | 0.004 | ** | 0.605 | ns | <0.001 | *** | 0.212 | ns |
| **0 mg.L-1 vs. 27 mg.L-1** | <0.001 | *** | 0.454 | ns | <0.001 | *** | 0.164 | ns |
| **1 mg.L-1 vs. 12 mg.L-1** | 0.363 | ns | <0.001 | *** | <0.001 | *** | 0.007 | ** |
| **1 mg.L-1 vs. 27 mg.L-1** | 0.03 | * | 0.001 | ** | 0.054 | ns | <0.001 | *** |
| **12 mg.L-1 vs. 27 mg.L-1** | 0.118 | ns | 0.929 | ns | <0.001 | *** | 0.241 | ns |
| **R47** | **WT** | | **∆*pvdE*** | | **∆*hcn*** | | **∆*pvdE* ∆*hcn*** | |
| **0 mg.L-1 vs. 1 mg.L-1** | <0.001 | *** | 0.056 | ns | 0.007 | ** | 0.851 | ns |
| **0 mg.L-1 vs. 12 mg.L-1** | <0.001 | *** | 0.048 | * | <0.001 | *** | 0.205 | ns |
| **0 mg.L-1 vs. 27 mg.L-1** | <0.001 | *** | 0.019 | * | <0.001 | *** | 0.108 | ns |
| **1 mg.L-1 vs. 12 mg.L-1** | <0.001 | *** | 0.033 | * | 0.007 | ** | 0.068 | ns |
| **1 mg.L-1 vs. 27 mg.L-1** | <0.001 | *** | 0.006 | ** | 0.004 | ** | 0.016 | * |
| **12 mg.L-1 vs. 27 mg.L-1** | 0.005 | ** | 0.561 | ns | 0.892 | ns | >0.999 | ns |

**Table S3: Statistical analysis of results of pyoverdine measurements with FeCl3 supplementation (Fig. 2).** We performed a mixed-effects model analysis with Geisser-Greenhouse correction followed by a Tukey’s test with 2 biological replicates with 3 technical replicates pooled together. In the first part of the table the effect of the genotypes within the different iron concentrations is shown, whereas in the second part it is the effect of the iron supplementation within the genotypes. The adjusted p-value is depicted on the left side of each cell, the significance on the right (∗=p < 0.05, ∗∗=p < 0.01, and ∗∗∗=p < 0.001).

| **R32** | **0 mg.L-1** | | **1 mg.L-1** | | **12 mg.L-1** | | **27 mg.L-1** | |
| --- | --- | --- | --- | --- | --- | --- | --- | --- |
| **WT vs. ∆*pvdE*** | 0.942 | ns | 0.358 | ns | 0.928 | ns | 0.995 | ns |
| **WT vs. ∆*hcn*** | <0.001 | *** | <0.001 | *** | <0.001 | *** | <0.001 | *** |
| **WT vs. ∆*pvdE* ∆*hcn*** | 0.003 | ** | 0.005 | ** | <0.001 | *** | <0.001 | *** |
| **∆*pvdE* vs. ∆*hcn*** | <0.001 | *** | <0.001 | *** | 0.169 | ns | <0.001 | *** |
| **∆*pvdE* vs. ∆*pvdE* ∆*hcn*** | 0.248 | ns | 0.58 | ns | 0.558 | ns | <0.001 | *** |
| **∆*hcn* vs. ∆*pvdE* ∆*hcn*** | 0.002 | ** | 0.003 | ** | 0.301 | ns | 0.033 | * |
| **R47** | **0 mg.L-1** | | **1 mg.L-1** | | **12 mg.L-1** | | **27 mg.L-1** | |
| **WT vs. ∆*pvdE*** | 0.99 | ns | >0.999 | ns | 0.985 | ns | >0.999 | ns |
| **WT vs. ∆*hcn*** | 0.989 | ns | 0.23 | ns | 0.004 | ** | 0.041 | * |
| **WT vs. ∆*pvdE* ∆*hcn*** | 0.328 | ns | <0.001 | *** | <0.001 | *** | <0.001 | *** |
| **∆*pvdE* vs. ∆*hcn*** | 0.398 | ns | 0.272 | ns | 0.005 | ** | 0.018 | * |
| **∆*pvdE* vs. ∆*pvdE* ∆*hcn*** | <0.001 | *** | <0.001 | *** | <0.001 | *** | <0.001 | *** |
| **∆*hcn* vs. ∆*pvdE* ∆*hcn*** | 0.648 | ns | 0.945 | ns | 0.067 | ns | 0.123 | ns |
|  |  |  |  |  |  |  |  |  |
| **R32** | **WT** | | **∆*pvdE*** | | **∆*hcn*** | | **∆*pvdE* ∆*hcn*** | |
| **0 mg.L-1 vs. 1 mg.L-1** | 0.576 | ns | 0.533 | ns | 0.145 | ns | 0.357 | ns |
| **0 mg.L-1 vs. 12 mg.L-1** | <0.001 | *** | 0.055 | ns | <0.001 | *** | <0.001 | *** |
| **0 mg.L-1 vs. 27 mg.L-1** | <0.001 | *** | <0.001 | *** | <0.001 | *** | <0.001 | *** |
| **1 mg.L-1 vs. 12 mg.L-1** | 0.001 | ** | 0.019 | * | <0.001 | *** | <0.001 | *** |
| **1 mg.L-1 vs. 27 mg.L-1** | 0.001 | ** | <0.001 | *** | <0.001 | *** | <0.001 | *** |
| **12 mg.L-1 vs. 27 mg.L-1** | 0.09 | ns | >0.999 | ns | <0.001 | *** | <0.001 | *** |
| **R47** | **WT** | | **∆*pvdE*** | | **∆*hcn*** | | **∆*pvdE* ∆*hcn*** | |
| **0 mg.L-1 vs. 1 mg.L-1** | 0.742 | ns | 0.273 | ns | 0.397 | ns | 0.152 | ns |
| **0 mg.L-1 vs. 12 mg.L-1** | >0.999 | ns | 0.019 | * | <0.001 | ** | 0.004 | ** |
| **0 mg.L-1 vs. 27 mg.L-1** | 0.996 | ns | 0.001 | ** | <0.001 | ** | 0.002 | ** |
| **1 mg.L-1 vs. 12 mg.L-1** | 0.245 | ns | 0.205 | ns | 0.935 | ns | 0.176 | ns |
| **1 mg.L-1 vs. 27 mg.L-1** | 0.117 | ns | 0.876 | ns | 0.949 | ns | 0.588 | ns |
| **12 mg.L-1 vs. 27 mg.L-1** | 0.669 | ns | 0.508 | ns | 0.998 | ns | 0.947 | ns |

**Table S4: Statistical analysis of results of mycelium growth inhibition with FeCl3 supplementation (Fig. 3).** We performed a mixed-effects model analysis with Geisser-Greenhouse correction followed by a Tukey’s test with 2 biological replicates with 4 technical replicates pooled together. In the first part of the table the effect of the genotypes within the different iron concentrations is shown, whereas in the second part it is the effect of the iron supplementation within the genotypes. The adjusted p-value is depicted on the left side of each cell, the significance on the right (∗=p < 0.05, ∗∗=p < 0.01, and ∗∗∗=p < 0.001).
